1 **Title:** A review on human gut microbial diversity in 21 tribal populations from India

2 **Authors:** Sayak Chakraborty<sup>¶</sup>, Sahid Afrid Mollick<sup>¶</sup> and Bidyut Roy<sup>\*</sup>

3 **Address:** Physical Anthropology Section, Anthropological Survey of India, Sector V,

4 EN: 7-9, Salt Lake City, Kolkata 700091, India

5 **\*Corresponding Author:** Bidyut Roy, E-mail: [bidyutroy8933@gmail.com](mailto:bidyutroy8933@gmail.com)

6 <sup>¶</sup>These authors contributed equally to this work.

7 **Short Title:** Gut microbiome in Indian Tribal population

8

9 **Key words:** Gut microbiota, healthy tribal populations, India

10

11

12

13

14

15

16

## 17 **Abstract**

18           From the earlier to modern times, the human populations passed through stages of  
19 subsistence such as foraging, rural farming and industrialized urban life. Till date various tribal  
20 people are living in geographically isolated areas depending on their traditional (gathering/rural  
21 farming) food sources. The long term cultural practices and food habits shaped the gut  
22 microbiome composition in these populations and contributed to health. However, the  
23 population-level study of the gut microbiota in Indian tribes with representative sampling across  
24 its geography and subsistence are limited. So, it is important to understand the complexity and  
25 diversity of the gut microbiome in healthy tribal populations, studied so far, to explore  
26 relationship among food, gut microbiome and health. Here, we reviewed gut microbiome studies  
27 which included 21 Indian tribal populations from different geographical regions to understand  
28 the role of food, ecology and cultural habits on variation of gut microbiota.

## 29 **Introduction**

30           The human gut microbiome consists of millions of distinct bacterial species [1] which  
31 have given rise to one of the most complex ecosystems. Previous estimates of bacteria present  
32 within an individual suggested that bacterial cells outnumber human cells by the ratio 150:1, but  
33 more recent estimates put the ratio at a more moderate level of 1:1 [2]. Human microbes  
34 predominantly present in oral cavity and gut, where the majority of digestion and absorption of  
35 nutrients takes place. They consist of bacteria, along with some archaea, eukaryotes, and viruses  
36 [3] which co-evolved with their hosts to form intricate and mutually beneficial partners [4]. Over  
37 the lifetime; diversity and abundance of gut microbiome vary depending on health, environment,  
38 diet, diseases, age of individuals and other life style factors [5, 6, 7].

39 In India, human gut microbiota is fairly a recent domain of research which were conducted to  
40 find diversity, variation with age [8], diet [9], obesity [10], and other diseases such as irritable  
41 (inflammatory) bowel syndrome [11]. Although few studies had been conducted in Indian tribes,  
42 it was realized that India warrants vigorous and comprehensive research into the gut microbiome  
43 in diverse ethnic populations in relation to geographies, culture and customs and food and drink  
44 habits [12]. Numerous pre-industrial and pre-agricultural tribal societies exist in India which has  
45 been earmarked by the Government of India. Among total 705 Scheduled Tribes (ST); 75 are  
46 identified as Particularly Vulnerable Tribal groups (PVTGs) [13]. These PVTGs, to an extent,  
47 have maintained much of their traditional lifestyle and social practices, so, investigations of gut  
48 microbiome in healthy PVTGs would be very useful data to understand health status in them. In  
49 this review, we will enumerate gut microbial diversity in healthy Indian tribes, studied so far.

## 50 **Materials and Methods**

51 Previously published studies related to gut microbiome of healthy Indian tribal communities  
52 were searched. The entire process of exclusion and inclusion process of the research papers  
53 reviewed in this study have been shown in a flowchart (Figure 1) prepared using PRISMA 2020  
54 template. Different headings and keywords were used to search the articles; such as ‘tribe’,  
55 ‘India’, ‘human gut microbiota’, ‘human gut microbiome’, ‘metagenomics’, and ‘human gut  
56 microbial diversity’. A total number of 36 published articles were identified from electronic  
57 databases such as Research Gate (n=1), and metadata services such as PubMed (n=25) and  
58 Google Scholar (n=10). From these 36 articles, 14 records were removed before screening since  
59 they did not match the keywords perfectly, so a total of 22 papers were selected for scrutiny.  
60 Again, one article was excluded due to the lack of proper description of quantitative data and

61 access to its supplementary files, so, 21 papers (8 from PubMed, 1 from Research Gate and 12  
 62 from Google Scholar) were considered for the scrutiny. Further, a total of 16 papers were  
 63 excluded for the reasons such as 4 articles overlapped with separate online sources, 8 articles had  
 64 insufficiency for the objective of the present review, and 4 articles did not have clear names of  
 65 the tribal populations. Finally, 5 articles fulfilled our inclusion criteria and, hence, considered for  
 66 the review and these publications reported 22 tribal populations and 1 non-tribal rural population  
 67 across 7 states of India (Figure 2; Table 1). But data from this non-tribal population was not  
 68 considered in this review.

69

70

71

**Table 1. Specifics of the studies reviewed here**

| Sl. No. | Publications used in this review | Studied Tribal Communities (21+1)         | Sample Size | Region of the Study | Diet/Lifestyle/Mode of Subsistence                                                                                                                                                  | Differential Composition of bacteria (Phylum-level)                                                                     | Proposed Influential Factors | Remarks, or Outcomes of the Study                                                                                                       |
|---------|----------------------------------|-------------------------------------------|-------------|---------------------|-------------------------------------------------------------------------------------------------------------------------------------------------------------------------------------|-------------------------------------------------------------------------------------------------------------------------|------------------------------|-----------------------------------------------------------------------------------------------------------------------------------------|
| 1.      | Dehingia et al. 2015 [14]        | Korbi, Tai-Aiton, Bodo, Santal, Tai-Phake | 78          | Assam               | Rice is the staple food for all the tribal groups, with variations in consumption of vegetables, fish, meat, legumes, whole grains, fruits, and tubers. The tribes from Manipur and | <i>Firmicutes</i> ,<br><i>Bacillota</i> ,<br><i>Bacteroidetes</i> ,<br><i>Actinomycetota</i> ,<br><i>Proteobacteria</i> | Geography and diet           | Geography and diet had significant effect on the gut bacterial profile of these Indian tribes which were dominated by <i>Prevotella</i> |
|         |                                  | Meitei, Kuki, Tangkhul                    | 30          | Manipur             |                                                                                                                                                                                     |                                                                                                                         |                              |                                                                                                                                         |
|         |                                  | Nepali, Bhutia, Lepcha                    | 27          | Sikkim              |                                                                                                                                                                                     |                                                                                                                         |                              |                                                                                                                                         |

|    |                           |                                             |                               |             |                                                                                                                       |                                                                                |                                        |                                                                                                                                                                           |
|----|---------------------------|---------------------------------------------|-------------------------------|-------------|-----------------------------------------------------------------------------------------------------------------------|--------------------------------------------------------------------------------|----------------------------------------|---------------------------------------------------------------------------------------------------------------------------------------------------------------------------|
|    |                           | Gond, Kolam, Nayak, Koya                    | 58                            | Telangana,  | Sikkim consume a relatively higher quantity of fermented foods, and dairy, along with dried and smoked fish and meat. |                                                                                |                                        |                                                                                                                                                                           |
|    |                           | Total                                       | 193                           |             |                                                                                                                       |                                                                                |                                        |                                                                                                                                                                           |
| 2. | Ramadass et al. 2017 [15] | One Rural Population (Unknown Ethnic Group) | 10                            | Tamil Nadu  | Consume millets-based diet. Eat pork every day. Do not consume any dairy products.                                    | <i>Firmicutes, Proteobacteria, Bacteroidetes, Actinobacteria</i>               | Dietary habits                         | <i>Actinobacteria</i> were significantly low in this group.                                                                                                               |
|    |                           | One Rural Tribal Population (Malaiyali)     | 10                            |             |                                                                                                                       |                                                                                |                                        |                                                                                                                                                                           |
|    |                           | Total                                       | 20                            |             |                                                                                                                       |                                                                                |                                        |                                                                                                                                                                           |
| 3. | Ganguli et al. 2019 [16]  | Savar                                       | 3 (father, mother, and child) | West Bengal | Foragers, (essentially 'carnivores') and dependent on forest produce.                                                 | <i>Verrucomicrobiota, Bacillota, Actinomycetota, Bacteroidetes, Firmicutes</i> | Geographic location and dietary habits | The propensity of transition of the gut microbial profiles from parents to son. Thus, revealing the parental contribution to the formation of the child's gut microbiome. |
| 4. | Basu et al. 2022 [17]     | Drukpa Bhutia                               | 3 (father, mother, and child) | West Bengal | Intake of locally produced vegetables and fruits, along with liquor and fermented dairy products.                     | <i>Bacteroidetes, Actinomycetota, Bacillota, Firmicutes, Pseudomonadota</i>    | Traditional dietary practice           | Parental contribution in the formation of the child's gut microbiome.                                                                                                     |

|    |                           |         |    |                   |                                                                                                                                                                                                                                                                       |                                                                                                                                                                                    |                                                  |                                                                                                                                                                                                |
|----|---------------------------|---------|----|-------------------|-----------------------------------------------------------------------------------------------------------------------------------------------------------------------------------------------------------------------------------------------------------------------|------------------------------------------------------------------------------------------------------------------------------------------------------------------------------------|--------------------------------------------------|------------------------------------------------------------------------------------------------------------------------------------------------------------------------------------------------|
| 5. | Hazarika et al. 2022 [18] | Adi     | 10 | Arunachal Pradesh | The Nyshi consume cereals, millet, leaves, fish, and meat. The Apatani tribe consume boiled vegetables, boiled fish, meat, and dairy products. All three tribes also consume fermented bamboo shoots, smoked pork, and smoked fish. Rice is their main staple cereal. | <i>Verrucomicrobiota</i> ,<br><i>Firmicutes</i> ,<br><i>Actinobacteria</i> ,<br><i>Proteobacteria</i> ,<br><i>Fusobacteria</i> ,<br><i>Elusimicrobia</i> ,<br><i>Bacteroidetes</i> | Dietary factors, and the overall state of health | Higher gut microbiome diversity with a high prevalence of <i>Prevotella</i> and <i>Collinsella</i> in the Adi and the Nyshi. <i>Bifidobacterium</i> and <i>Catenibacterium</i> in the Apatani. |
|    |                           | Apatani | 10 |                   |                                                                                                                                                                                                                                                                       |                                                                                                                                                                                    |                                                  |                                                                                                                                                                                                |
|    |                           | Nyshi   | 10 |                   |                                                                                                                                                                                                                                                                       |                                                                                                                                                                                    |                                                  |                                                                                                                                                                                                |
|    |                           | Total   | 30 |                   |                                                                                                                                                                                                                                                                       |                                                                                                                                                                                    |                                                  |                                                                                                                                                                                                |

72

73

74

**Table 2. Methods employed in the reported studies**

| Sl. No. | Publications              | Sample size (Age ranges) | Study Objectives                                                                                 | Specimen Type  | Techniques                                                                                                                                                                                 |
|---------|---------------------------|--------------------------|--------------------------------------------------------------------------------------------------|----------------|--------------------------------------------------------------------------------------------------------------------------------------------------------------------------------------------|
| 1.      | Dehingia et al. 2015 [14] | 193 (20-35 years)        | Gut bacterial diversity of the tribes                                                            | Faecal samples | DNA was extracted from the faecal samples using QIAGEN DNA Stool Mini-Kit (QIAGEN, Hilden, Germany). Sequencing of the V3- V4 regions of 16S rRNA was done on the Illumina MiSeq Platform. |
| 2.      | Ramadass et al. 2017 [15] | 20 (18-60 years)         | Comparison of faecal microbiota of healthy adults in south India among the tribal and non-tribal | Faecal samples | DNA was extracted from approximately faecal samples using QIAamp DNA stool mini kits. Sequencing the V3-V4 regions of 16s rRNA was done using Roche 454 GLX Titanium                       |

|    |                           |                         | population                            |                | sequencer (Roche Diagnostics GmbH)                                                                                                                                         |
|----|---------------------------|-------------------------|---------------------------------------|----------------|----------------------------------------------------------------------------------------------------------------------------------------------------------------------------|
| 3. | Ganguli et al. 2019 [16]  | 3 (7, 26, and 30 years) | Gut microbiome of a foraging tribe.   | Faecal samples | DNA isolation was done following the THSTI Method given by Bag et al. (2016) [19]. NGS Sequencing was done in the Illumina HiSeq sequencing platform.                      |
| 4. | Basu et al. 2022 [17]     | 3 (5, 27, and 29 years) | Gut microbiome of a tribal population | Faecal samples | DNA isolation was done following the THSTI Method given by Bag et al. (2016) [19]. NGS Sequencing was done in the Illumina HiSeq sequencing platform.                      |
| 5. | Hazarika et al. 2022 [18] | 30 (20-60 years)        | Gut microbiome of a tribal community  | Faecal samples | DNA was extracted from stool samples using the QIAamp DNA Stool Mini Kit. Sequencing of the V3- V4 regions of 16S rRNA was done on the Illumina MiSeq sequencing platform. |

75

76 In these studies, fecal samples were collected aseptically from all individuals, kept at -20° or -80  
77 ° as reported and used for bacterial DNA isolation using different methods (Table 2). Segment of  
78 bacterial ribosomal 16S DNA were PCR amplified and sequenced in different NGS platforms to  
79 find the diversity of gut bacteria in individuals of these populations. Analyzed data of the phyla  
80 and genera of the bacteria were taken from the reported papers. Heat maps of the bacterial phyla  
81 and genera of the samples were tabulated in MS Excel 2010 (Figure 3, Figure 4) using PAST  
82 4.04.

83

84

## 85 **Analysis and Results**

86 All reported articles mainly attempted to address the gut microbial diversity in these  
87 tribal populations based on three major factors such as dietary and cultural habits, ethnicity, and

88 geographic location (Table 1). Diet and social drinks has been found to be different in different  
89 tribes based on their geography and ethnicity. The North-East Indian tribes, including Sikkim,  
90 were found to have similar food habits, though they belongs to different geo-political boundaries  
91 and shared ethnic affiliation. Sample sizes in the studies were different ranging from 193 [14] to  
92 merely 3 [16, 17].

93 Thirty-four bacterial genera, belonging to 10 phyla, have been reported in these studies (Figure 3  
94 and Figure 4). Except Hazarika et al. (2022) [18], remaining studies reported presence of 3  
95 bacterial phyla *Bacteroidetes* (generally known by its more popular synonym *Bacteroidota*),  
96 *Firmicutes*, and *Bacillota*. However, *Bacillota* is presently considered to be a synonym of  
97 *Firmicutes* [20]. So, only 2 phyla (*Bacteroidota* and *Bacillota*) were found across all the studied  
98 populations. Apart from the above-mentioned 2 phyla, 8 other bacterial phyla (*Actinomycetota*,  
99 *Proteobacteria*, *Actinobacteria*, *Spirochaetes*, *Elusimicrobia*, *Pseudomonadota*,  
100 *Verrucomicrobiota*, and *Fusobacteria*) have been reported in these tribal populations,  
101 irrespective of ethnicity, geography and dietary habits. *Firmicutes*, *Proteobacteria*, and  
102 *Bacteroidetes* were the most abundant bacterial phyla reported in these populations.  
103 Additionally, few North-East Indian tribes (Adi, Apatani, Nyshi) and one South Indian tribal  
104 group (Malaiyali) had *Actinobacteria*. One tribe (Drukpa Bhutia) from West Bengal had  
105 *Pseudomonadota*. The phylum *Fusobacteria* were only found in North-East Indian tribes (Adi,  
106 Apatani, and Nyshi) from Arunachal Pradesh (Figure 3).

107 At the genus-level, the most abundant bacteria were *Faecalibacterium* and *Roseburia* (both from  
108 phylum *Bacillota*) which have been reported in all the tribal populations mentioned here. The  
109 bacterial genera of *Ruminococcus* (phylum *Bacillota*), *Prevotella* (phylum *Bacteroidetes*),  
110 *Blautia* (phylum *Bacillota*) were present in nearly all studied populations, followed by



111 *Bifidobacterium* (phylum *Actinomycetota*) and *Eubacterium* (phylum *Bacillota*). The bacterial  
112 genera with minimal presence, (i.e. occurring in only one tribal community) were: *Akkermansia*  
113 (in Savar), *Odoribacter* (in Savar), *Parabacteroides* (in Savar), *Veillonella* (in Drukpa Bhutia),  
114 *Subdoligranulim* (in Malaiyali), *Proteus* (in Drukpa Bhutia) and *Enterococcus* (in Drukpa  
115 Bhutia) (Figure 4).

116 The core gut bacteria in the tribes of Telangana and Assam consisted of *Prevotella*,  
117 *Faecalibacterium*, *Eubacterium*, *Clostridium*, *Blautia*, *Collinsella*, *Ruminococcus* and  
118 *Roseburia*. Additionally, the bacterial genera *Bacteroides*, *Dialister* and *Veillonella* were also  
119 found to be core bacteria in the tribes of Manipur. *Bacteroides*, *Dialister*, *Bifidobacterium* and  
120 *Lactobacillus* were the genera found in the tribes of Sikkim. The Adi and Nyshi tribes of  
121 Arunachal Pradesh had high prevalence of *Prevotella* and *Collinsella*, but Apatani tribe had high  
122 prevalence of *Bifidobacterium* and *Catenibacterium*, even though these tribes were living in the  
123 same geographical region and had similar dietary practices. In Savar and Drukpa Bhutia tribes  
124 from West Bengal; *Bacteroides*, *Bifidobacterium*, *Streptococcus*, *Faecalibactenum*,  
125 *Ruminococcus*, *Prevotella*, *Roseburia*, *Collinsella* were the most common bacterial genus found  
126 in both the communities despite they were living in separate geographic regions of the state and  
127 had different dietary practices (Figure 2 and Figure 4).

## 128 **Discussion**

129 India has become a melting pot where the different lifestyle factors and food choices are  
130 being infiltrated in many indigenous and traditional lifestyles even in tribal communities [14]  
131 with the alteration of the gut microbiome profile [16, 18]. Although some communities still  
132 remained isolated so there are some chances to study gut bacterial diversity in these isolated

133 tribal populations to compare the future changes in gut bacterial diversity due to food and life  
134 styles factors. Striking disparities between the gut microbial taxa of urban populations and rural  
135 tribal populations have also been reported [21] which indicate such shifts may have been caused  
136 by different dietary and lifestyle practices. Dehingia et al. (2015) [14] claimed that geographical  
137 locations, culture and diet had significant influence on gut bacterial profile of the Indian tribes  
138 which were dominated by the genus *Prevotella*. The Drukpa Bhutia tribe in north of West Bengal  
139 followed traditional agriculture based diet along with some foraging and livestock rearing  
140 products [17] and the Savar tribe in south of West Bengal led a relatively more foraging lifestyle  
141 [16], but both of them retained their ancestral gut microbiome profile since they were not  
142 impacted much by external influences such as present-day life style factors and food. These two  
143 studies, on Drukpa Bhutia and Savar, also claimed parental contribution to the composition of  
144 the child's gut microbiota.

145 The Adi, Apatani, and Nyshi communities seemed to have same bacterial phyla (Supplementary  
146 Table 1, Figure 3) and genera (Supplementary Table 1, Figure 4) in their gut. This might be due  
147 to similar dietary patterns supported by agricultural subsistence economy (Table 2) and shared  
148 highland ecology of Arunachal Pradesh. In addition, all of them share a common ancestral  
149 cultural identity given that they are all speakers of the Tani sub-group of languages in the Sino-  
150 Tibetan language family [22]. These three indigenous groups from Arunachal Pradesh are also  
151 unique in the context that they had the highest diversity of phyla among all indigenous studied  
152 tribes (Figure 3). An interesting observation was that apart from the three aforementioned tribes  
153 of Arunachal Pradesh; the Drukpa Bhutia and the Savar from West Bengal; the Malaiyalis  
154 from Tamil Nadu and other indigenous communities, spread across the states of Manipur, Assam,  
155 Telangana, and Tamil Nadu contained the same five bacterial phyla (*Firmicutes*, *Proteobacteria*,

156 *Bacteroidetes*, *Actinomycetota*, and *Bacillota*) (Figure 3) in their gut samples. So, similarities of  
157 phyla were observed in tribal populations living over such a large ecological range and unrelated  
158 linguistic communities (such as Tibeto-Burmese, Dravidian, and Austro-Asiatic groups) but  
159 there were differences at the level of the bacterial genera in these populations (Figure 4).

160 *Faecalibacterium* and *Roseburia* (both from phylum *Bacillota*) have been reported to be present  
161 in the gut of all the tribal groups. *Faecalibacterium* (its sole species, *F. prausnitzii*) is known to  
162 be a beneficial bacterium in the human gut as it produces butyrate (a small chain fatty acid) in  
163 the intestine for the metabolism of sugar. Further, it helps in protecting diseases of the bowel  
164 such as Crohn's Disease [23] and irritable bowel disease [24]. *Roseburia* has similar functions  
165 like *Faecalibacterium*. For optimum performance, *Faecalibacterium* requires presence of some  
166 other bacteria such as *Bacteroides thetaiotaomicron* in gut [25] in order to make more butyrate  
167 production by *Faecalibacterium*. Among the populations mentioned in the review, 14 out of 21  
168 tribes had *Bacteroides* alongside *Faecalibacterium* in gut.

169 The tribes in Telangana [14] seem to have the same 5 bacterial phyla (*Firmicutes*,  
170 *Proteobacteria*, *Bacteroidetes*, *Actinomycetota*, and *Bacillota*) in their guts and share 18 similar  
171 bacterial genera. Among them; Gond, Kolam, and Koya are Dravidian-speaking communities  
172 which are enlisted as Scheduled Tribes of India, however the identity of the fourth tribe, Nayak,  
173 is not clear. Nayak or Naik in Telangana is a surname adopted by various communities [26] and  
174 may not be a single tribal identity. The gut microbial composition of three Tibeto-Burmese tribes  
175 (i.e. Nepali, Bhutia, and Lepcha) of Sikkim showed presence of 5 common bacterial phyla  
176 (*Firmicutes*, *Proteobacteria*, *Bacteroidetes*, *Actinomycetota*, and *Bacillota*) (Figure 4) and 20  
177 common genera. It may be noted that bacterial phyla present in the tribes of Telangana and  
178 Sikkim are similar, despite their geographic, culture, dietary and ethnic differences.

179 The Savars of West Bengal happened to have three genera of bacteria unique to them:  
180 *Akkermansia* (phylum *Verrucomicrobia*), *Odoribacter* and *Parabacteroides* (both from phylum  
181 *Bacteroidetes*). *Akkermansia* has been reported to have several benefits towards human health  
182 such as reduction of body weight, resistance towards bowel diseases, and even cancer [27]. A  
183 decreased level of *Odoribacter* in the human gut has been related to various microbiota-  
184 associated diseases such as non-alcoholic fatty liver, cystic fibrosis, and inflammatory bowel  
185 disease [28]. Abundance of *Parabacteroides* in the gut is known to be useful in the fight against  
186 obesity and other gut-associated diseases [29, 30, 31]. On the other hand, the Drukpa Bhutia  
187 from the northern part of West Bengal had unique genera: *Veillonella*, *Enterococcus* (phylum  
188 *Bacillota*), and *Proteus* (phylum *Pseudomonadota*). But *Veillonella* helps in enhancement of  
189 performance of individuals via lactic acid metabolism and production of sugar [32]. The Drukpa  
190 Bhutia inhabits at remote regions of semi-forested land. The occurrence of a bacterium  
191 associated with work performance enhancement may be related to the dairy consumption which  
192 is a key source of sugar for energy. *Enterococcus* is infamous for its virulence and association  
193 with various diseases such as sepsis, urinary tract infections, and meningitis within the human  
194 body [33]. Its occurrence in the gut of Drukpa Bhutia did not reveal any associated disease and  
195 may require further detailed investigation with more samples and involvement of clinicians.  
196 Similarly, *Proteus* is another pathogenic bacterium and causes urinary tract infections, so further  
197 investigation is very urgent.

198 While considering the details of the research papers reviewed, it was noticed that these studies  
199 had several limitations. Ramadass et al. (2017) [15] used two broad sample groups, one  
200 consisting of individuals from the Malayali community (termed as a ‘rural tribal population’)  
201 and a ‘rural population’. The “rural population” hints a generic term used to designate

202 individuals of a non-homogeneous non-tribal group consisted of individuals from different  
203 religion, caste, etc. Using such a sample of non-homogeneous rural inhabitants to compare with  
204 one single homogeneous tribal community, inhabiting the same region/district in Tamil Nadu,  
205 may yield the spurious results. So, data of this “rural population” was excluded from this review.  
206 After all; abundance, composition, richness and evenness of human gut microbiota depends on  
207 lifestyle and dietary pattern specific to communities. Dehingia et al. (2015) [14] used a large  
208 sample size (n = 193) from 15 tribal communities. But they mentioned that these tribal  
209 communities belonged to different states with low sample size in each state: Assam (5  
210 communities, n = 78), Manipur (3 communities, n = 30), Sikkim (3 communities, n = 30), and  
211 Telangana (4 communities, n = 58). The lack of availability of sample size of each community  
212 and non-uniformity of sample size in each community limited the study for comparing tribal  
213 specific gut microbiome. Those studies seem to be preliminary reports since none of them  
214 mentioned the sample size required for this type of study with sufficient power. In case of the  
215 studies on the Savar [16] and Drukpa Bhutia [17], from West Bengal, the sample sizes were very  
216 low (n = 3) and constituted a single nuclear family unit (mother, father and a child). These two  
217 papers aimed at visualizing the diversity of bacterial phyla and genera in the guts of these  
218 families and discussing the passage of the bacterial genera/taxa from parents to child in the same  
219 family. The researchers should have considered several nuclear family units of mother, father,  
220 and child to get proper statistical power and similarity index (Czekanowski Coefficient and  
221 Squared Euclidean Distance) to know the passing of bacterial taxa and genera from parents to  
222 child.

## 223 **Conclusion**

224 Healthy tribal groups of India are important populations to find bacterial diversity in gut  
225 microbiota since most of them living in isolated places without much mixing with urban  
226 populations. Relative similarity in the core gut microbiota of tribes was noted, considering their  
227 close geographical proximity, similar dietary practices and common ethno-linguistic group.  
228 Although, Chaudhari et al. (2020) [34] reported association of age with the frequencies of  
229 different gut bacteria, but we could not study changes of bacterial genus as the age changes since  
230 in these populations since sample sizes were low and detailed demographic details were not  
231 available. Further studies on gut microbiota of isolated tribal groups can help to reveal the role of  
232 gut microbiota towards the health and predisposition towards gastrointestinal diseases and  
233 discovery of probiotic markers for therapeutic purpose.

234

235 **Author Contribution:** SC: Wrote draft of paper, Figures and Tables, SAM: Initial draft,  
236 searching of related review articles, Initial Figures and Tables; BR: Final paper, Figures and  
237 Tables

238

239 **Acknowledgement:** SC and SAM received SRF from Anthropological Survey of India during  
240 this study. BR: Received R N Tagore Scholarship from Ministry of Culture, Government of India  
241 to work at Anthropological Survey of India, Kolkata.

242

243

244 **References**

- 245       **1.** Sankar, S.A., Lagier, J.C., Pontarotti, P., Raoult, D. and Fournier, P.E., 2015. The human  
246       gut microbiome, a taxonomic conundrum. *Systematic and Applied Microbiology*, 38(4),  
247       p.276-286.
- 248       **2.** Sender, R., Fuchs, S. and Milo, R., 2016. Are we really vastly outnumbered? Revisiting  
249       the ratio of bacterial to host cells in humans. *Cell*, 164(3), p.337-340.
- 250       **3.** Matijašić, M., Meštrović, T., Čipčić Paljetak, H., Perić, M., Barešić, A. and Verbanac, D.,  
251       2020. Gut microbiota beyond bacteria—mycobiome, virome, archaeome, and eukaryotic  
252       parasites in IBD. *International Journal of Molecular Sciences*, 21(8), p.2668.
- 253       **4.** Thursby, E. and Juge, N., 2017. Introduction to the human gut microbiota. *Biochemical*  
254       *Journal*, 474(11), p.1823-1836.
- 255       **5.** Yatsunenکو, T., Rey, F.E., Manary, M.J., Trehan, I., Dominguez-Bello, M.G., Contreras,  
256       M., Magris, M., Hidalgo, G., Baldassano, R.N., Anokhin, A.P. and Heath, A.C., 2012.  
257       Human gut microbiome viewed across age and geography. *Nature*, 486(7402), p.222-  
258       227.
- 259       **6.** Karlsson, F., Tremaroli, V., Nielsen, J. and Bäckhed, F., 2013. Assessing the human gut  
260       microbiota in metabolic diseases. *Diabetes*, 62(10), p.3341-3349.
- 261       **7.** David, L.A., Maurice, C.F., Carmody, R.N., Gootenberg, D.B., Button, J.E., Wolfe, B.E.,  
262       Ling, A.V., Devlin, A.S., Varma, Y., Fischbach, M.A. and Biddinger, S.B., 2014. Diet  
263       rapidly and reproducibly alters the human gut microbiome. *Nature*, 505(7484), p.559-  
264       563.
- 265       **8.** Marathe, N., Shetty, S., Lanjekar, V., Ranade, D. and Shouche, Y., 2012. Changes in  
266       human gut flora with age: an Indian familial study. *BMC Microbiology*, 12, p.1-10.

- 267 **9.** Kabeerdoss, J., Jayakanthan, P., Pugazhendhi, S. and Ramakrishna, B.S., 2015.  
268 Alterations of mucosal microbiota in the colon of patients with inflammatory bowel  
269 disease revealed by real time polymerase chain reaction amplification of 16S ribosomal  
270 ribonucleic acid. *The Indian Journal of Medical Research*, 142(1), p.23.
- 271 **10.** Patil, D.P., Dhotre, D.P., Chavan, S.G., Sultan, A., Jain, D.S., Lanjekar, V.B.,  
272 Gangawani, J., Shah, P.S., Todkar, J.S., Shah, S. and Ranade, D.R., 2012. Molecular  
273 analysis of gut microbiota in obesity among Indian individuals. *Journal of Biosciences*,  
274 37, p.647-657.
- 275 **11.** Verma, R., Verma, A.K., Ahuja, V. and Paul, J., 2010. Real-time analysis of mucosal  
276 flora in patients with inflammatory bowel disease in India. *Journal of Clinical*  
277 *Microbiology*, 48(11), p.4279-4282.
- 278 **12.** Shetty, S.A., Marathe, N.P. and Shouche, Y.S., 2013. Opportunities and challenges for  
279 gut microbiome studies in the Indian population. *Microbiome*, 1(1), p.1-12.
- 280 **13.** Ministry of Home Affairs, Government of India. 2001, 2011. *Census of India*.
- 281 **14.** Dehingia, M., Thangjam Devi, K., Talukdar, N.C., Talukdar, R., Reddy, N., Mande, S.S.,  
282 Deka, M. and Khan, M.R., 2015. Gut bacterial diversity of the tribes of India and  
283 comparison with the worldwide data. *Scientific Reports*, 5(1), p.18563.
- 284 **15.** Ramadass, B., Rani, B.S., Pugazhendhi, S., John, K.R. and Ramakrishna, B.S., 2017.  
285 Faecal microbiota of healthy adults in south India: comparison of a tribal & a rural  
286 population. *The Indian Journal of Medical Research*, 145(2), p.237.
- 287 **16.** Ganguli, S., Pal, S., Das, K., Banerjee, R. and Bagchi, S.S., 2019. Gut microbial dataset  
288 of a foraging tribe from rural West Bengal-insights into unadulterated and transitional  
289 microbial abundance. *Data in Brief*, 25, p.103963.



- 290 **17.** Basu, S., Das, K., Ghosh, M.M., Banerjee, R., Bagchi, S.S. and Ganguli, S., 2022. First  
291 report of gut bacterial dataset of a tribal Bhutia family from West Bengal, India. *Data in*  
292 *Brief*, 41, p.107859.
- 293 **18.** Hazarika, P., Chattopadhyay, I., Umpo, M., Choudhury, Y. and Sharma, I., 2022.  
294 Elucidating the gut microbiome alterations of tribal community of Arunachal Pradesh:  
295 perspectives on their lifestyle or food habits. *Scientific Reports*, 12(1), p.18296.
- 296 **19.** Bag, S., Saha, B., Mehta, O., Anbumani, D., Kumar, N., Dayal, M., Pant, A., Kumar, P.,  
297 Saxena, S., *et al.* 2016. An Improved Method for High Quality Metagenomics DNA  
298 Extraction from Human and Environmental Samples. *Scientific Reports*, 6, p.26775.
- 299 **20.** Oren, A. and Garrity, G.M., 2021. Valid publication of new names and new combinations  
300 effectively published outside the IJSEM. *International Journal of Systematic and*  
301 *Evolutionary Microbiology*, 71(11), p.005096.
- 302 **21.** Singh, R., Haque, M.M. and Mande, S.S., 2019. Lifestyle-induced microbial gradients: an  
303 Indian perspective. *Frontiers in Microbiology*, 10, p.2874.
- 304 **22.** Sun, T. J. (1993). *A Historical-Comparative Study of the Tani (Mirish) Branch in Tibeto-*  
305 *Burman*. University of California, Berkeley.
- 306 **23.** Wright, E.K., Kamm, M.A., Teo, S.M., Inouye, M., Wagner, J. and Kirkwood, C.D.,  
307 2015. Recent advances in characterizing the gastrointestinal microbiome in Crohn's  
308 disease: a systematic review. *Inflammatory Bowel Diseases*, 21(6), p.1219-1228.
- 309 **24.** Lopez-Siles, M., Duncan, S.H., Garcia-Gil, L.J. and Martinez-Medina, M., 2017.  
310 *Faecalibacterium prausnitzii*: from microbiology to diagnostics and prognostics. *The*  
311 *ISME Journal*, 11(4), p.841-852.

- 312       **25.** Wrzosek, L., Miquel, S., Noordine, M.L., Bouet, S., Chevalier-Curt, M.J., Robert, V.,  
313       Philippe, C., Bridonneau, C., Cherbuy, C., Robbe-Masselot, C. and Langella, P., 2013.  
314       *Bacteroides thetaiotaomicron* and *Faecalibacterium prausnitzii* influence the production  
315       of mucus glycans and the development of goblet cells in the colonic epithelium of a  
316       gnotobiotic model rodent. *BMC Biology*, 11, p.1-13.
- 317       **26.** Singh, K. S., 1993. *Ethnography, Customary Law, and Change*. Concept Publishing  
318       Company. p.249.
- 319       **27.** Jayachandran, M., Chung, S.S.M. and Xu, B., 2020. A critical review of the relationship  
320       between dietary components, the gut microbe *Akkermansia muciniphila*, and human  
321       health. *Critical Reviews in Food Science and Nutrition*, 60(13), p.2265-2276.
- 322       **28.** Hiippala, K., Barreto, G., Burrello, C., Diaz-Basabe, A., Suutarinen, M., Kainulainen, V.,  
323       Bowers, J.R., Lemmer, D., Engelthaler, D.M., Eklund, K.K. and Facciotti, F., 2020.  
324       Novel *Odoribacter splanchnicus* strain and its outer membrane vesicles exert  
325       immunoregulatory effects in vitro. *Frontiers in Microbiology*, 11, p.575455.
- 326       **29.** Wang, K., Liao, M., Zhou, N., Bao, L., Ma, K., Zheng, Z., Wang, Y., Liu, C., Wang, W.,  
327       Wang, J., Liu, S. J., Liu, H., 2019. *Parabacteroides distasonis* Alleviates Obesity and  
328       Metabolic Dysfunctions via Production of Succinate and Secondary Bile Acids. *Cell*  
329       *Reports*, 26(1), p.222–235.
- 330       **30.** Wu, T.R., Lin, C.S., Chang, C.J., Lin, T.L., Martel, J., Ko, Y.F., Ojcius, D.M., Lu, C.C.,  
331       Young, J.D. and Lai, H.C., 2019. Gut commensal *Parabacteroides goldsteinii* plays a  
332       predominant role in the anti-obesity effects of polysaccharides isolated from *Hirsutella*  
333       *sinensis*. *Gut*, 68(2), p.248-262.

- 334 **31.** Zeng, Q., Li, D., He, Y., Li, Y., Yang, Z., Zhao, X., Liu, Y., Wang, Y., Sun, J., Feng, X.  
335 et al., 2019. Discrepant gut microbiota markers for the classification of obesity-related  
336 metabolic abnormalities. *Sci Rep* 9, 13424.
- 337 **32.** Scheiman, J., Lubert, J.M., Chavkin, T.A., MacDonald, T., Tung, A., Pham, L.D.,  
338 Wibowo, M.C., Wurth, R.C., Punthambaker, S., Tierney, B.T. and Yang, Z., 2019. Meta-  
339 omics analysis of elite athletes identifies a performance-enhancing microbe that functions  
340 via lactate metabolism. *Nature Medicine*, 25(7), p.1104-1109.
- 341 **33.** Murray, B E., 1990. The life and times of the Enterococcus. *Clinical Microbiology*  
342 *Reviews*, 3(1), p.46-65.
- 343 **34.** Chaudhari, D. S., Dhotre, D. P., Agarwal, D. M., Gaike, A. H., Bhalerao, D., Jadhav, P.  
344 et al. (2020). Gut, oral and skin microbiome of Indian patrilineal families reveal  
345 perceptible association with age. *Scientific Reports*, 10(1), p.5685.

### Searching of studies in databases and online publication

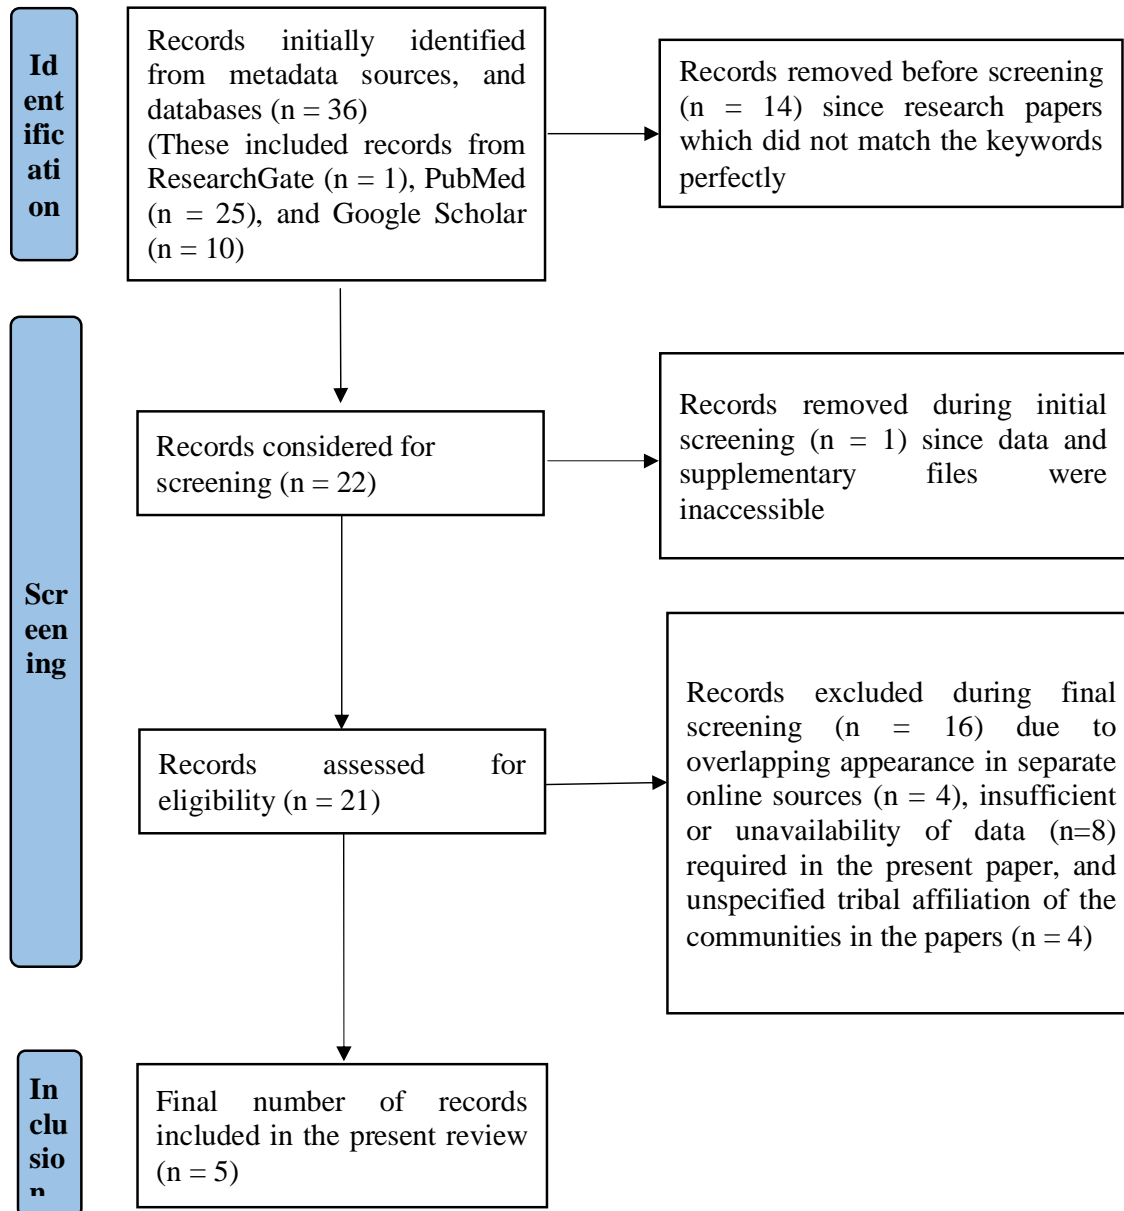

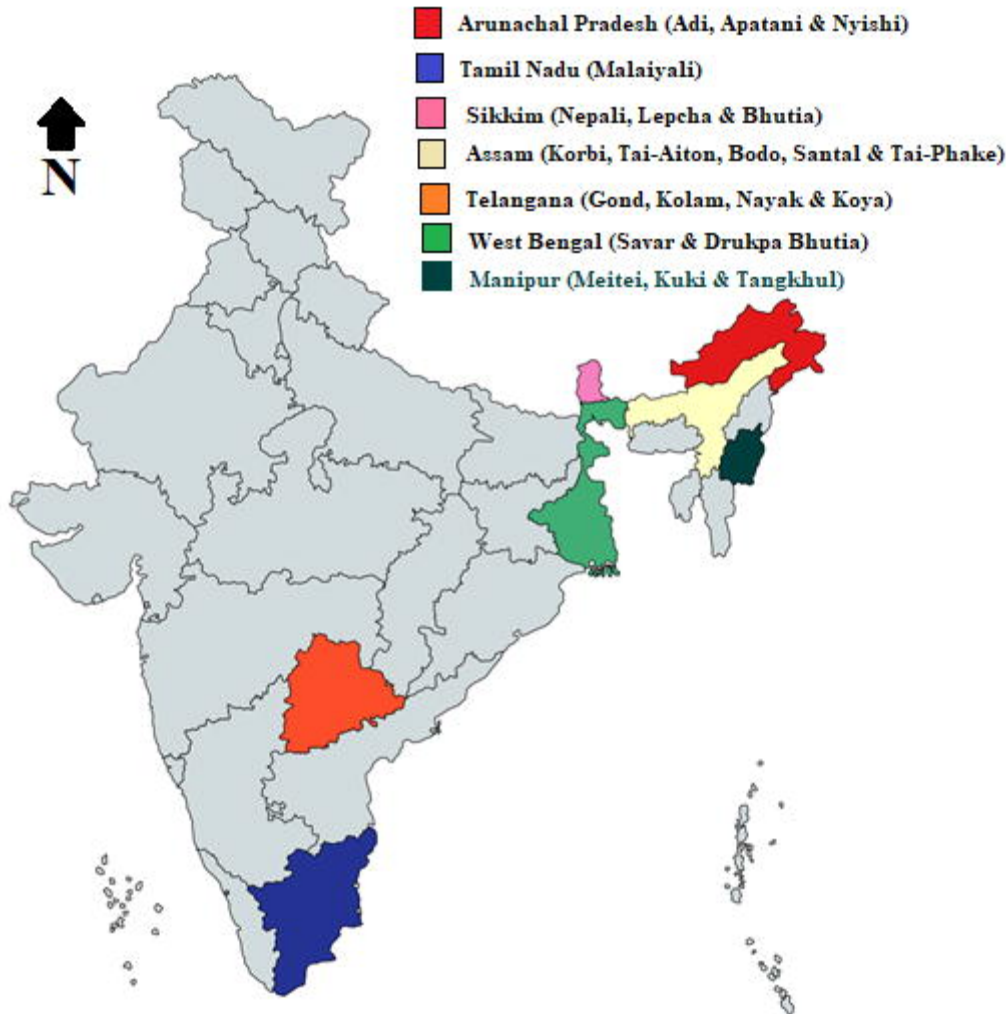



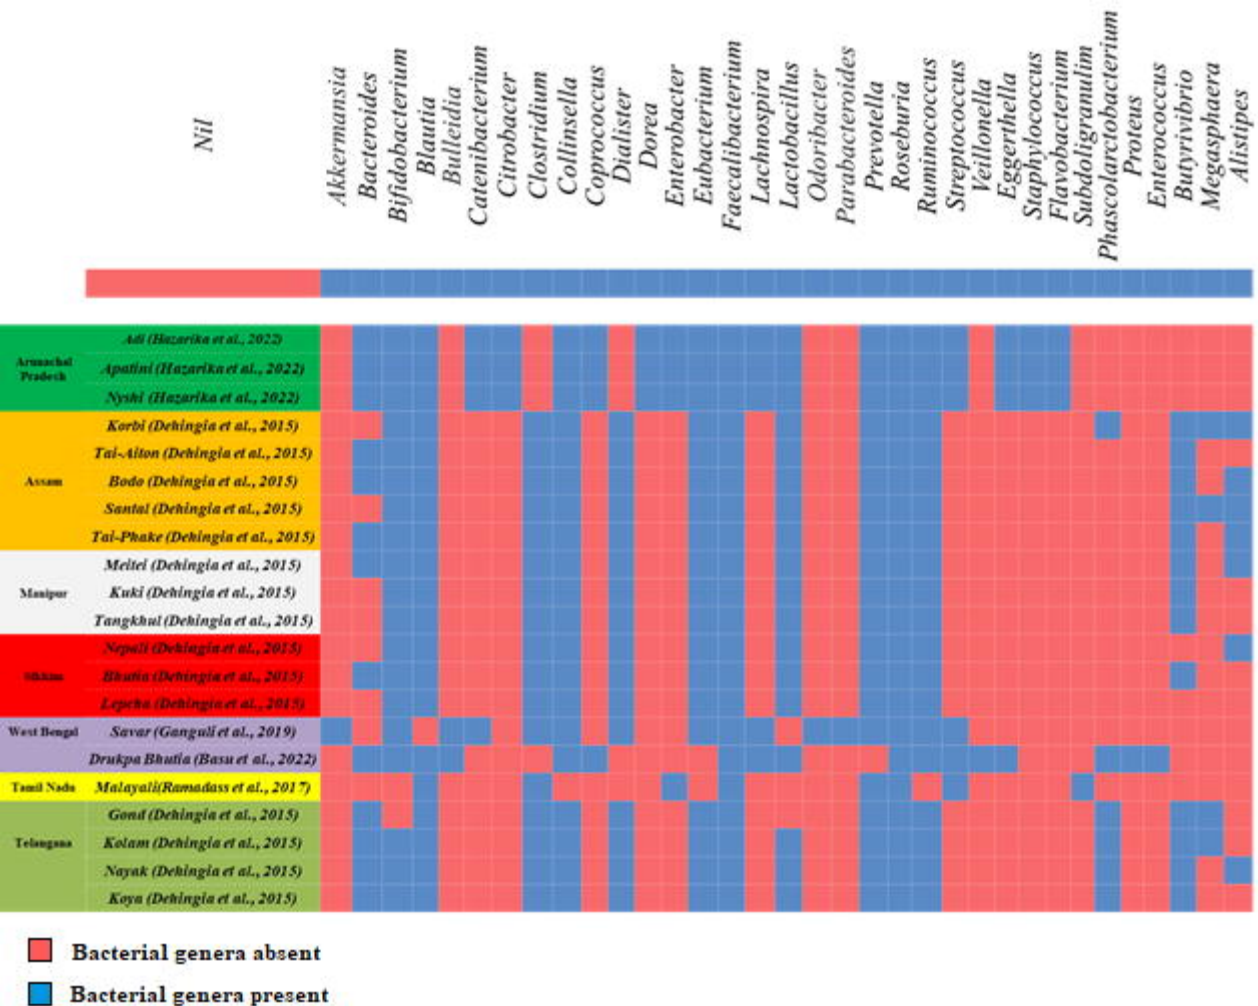

**Figure 1. Flowchart for the selection of the research papers considered in the present review**

**Figure 2. Geographical locations/states of the tribal communities whose gut microbiome has been studied**

**Figure 3. Phylum of the bacteria present in the studied tribes**

**Figure 4. Genus of the bacteria present in the studied tribes**



**Supplementary Table: 1**

**Phylum and genera of the various gut microbes present in the studied tribal populations**

| Sl. No. | Phylum                | Genera                  | Tribal Population                                                                                                                                                         |
|---------|-----------------------|-------------------------|---------------------------------------------------------------------------------------------------------------------------------------------------------------------------|
| 1       | <i>Actinobacteria</i> | -                       | Malaiyali, Adi, Apatani, Nyshi                                                                                                                                            |
| 2       | <i>Actinomycetota</i> | <i>Bifidobacterium</i>  | Adi, Apatani, Nyshi, Drukpa Bhutia, Savar, Korbi, Tai-Aiton, Bodo, Santal, Tai-Phake, Meitei, Kuki, Tangkhul, Nepali, Bhutia, Lepcha, Kolam, Nayak, Koya                  |
|         |                       | <i>Collinsella</i>      | Adi, Apatani, Nyshi, Drukpa Bhutia, Savar, Korbi, Tai-Aiton, Bodo, Santal, Tai-Phake, Meitei, Kuki, Tangkhul, Nepali, Bhutia, Lepcha, Kolam, Nayak, Koya, Gond            |
|         |                       | <i>Egerthella</i>       | Drukpa Bhutia, Adi, Apatani, Nyshi                                                                                                                                        |
| 3       | <i>Bacillota</i>      | <i>Faecalibacterium</i> | Adi, Apatani, Nyshi, Drukpa Bhutia, Savar, Korbi, Tai-Aiton, Bodo, Santal, Tai-Phake, Meitei, Kuki, Tangkhul, Nepali, Bhutia, Lepcha, Kolam, Nayak, Koya, Gond, Malaiyali |
|         |                       | <i>Roseburia</i>        | Adi, Apatani, Nyshi, Drukpa Bhutia, Savar, Korbi, Tai-Aiton, Bodo, Santal, Tai-Phake, Meitei, Kuki, Tangkhul, Nepali, Bhutia, Lepcha, Kolam, Nayak, Koya, Gond, Malaiyali |
|         |                       | <i>Ruminococcus</i>     | Adi, Apatani, Nyshi, Drukpa Bhutia, Savar, Korbi, Tai-Aiton, Bodo, Santal, Tai-Phake, Meitei, Kuki, Tangkhul, Nepali, Bhutia, Lepcha, Kolam, Nayak, Koya, Gond            |
|         |                       | <i>Blautia</i>          | Adi, Apatani, Nyshi, Drukpa Bhutia, Korbi, Tai-Aiton, Bodo, Santal, Tai-Phake, Meitei, Kuki, Tangkhul, Nepali, Bhutia, Lepcha, Kolam, Nayak, Koya, Gond, Malaiyali        |
|         |                       | <i>Eubacterium</i>      | Adi, Apatani, Nyshi, Savar, Korbi, Tai-Aiton, Bodo, Santal, Tai-Phake, Meitei, Kuki, Tangkhul, Nepali, Bhutia, Lepcha, Kolam, Nayak, Koya, Gond                           |
|         |                       | <i>Enterococcus</i>     | Drukpa Bhutia                                                                                                                                                             |
|         |                       | <i>Clostridium</i>      | Savar, Korbi, Tai-Aiton, Bodo, Santal, Tai-Phake, Meitei, Kuki, Tangkhul, Nepali, Bhutia, Lepcha, Kolam, Nayak, Koya, Gond, Malaiyali                                     |
|         |                       | <i>Dialister</i>        | Savar, Korbi, Tai-Aiton, Bodo, Santal, Tai-Phake, Meitei, Kuki, Tangkhul, Nepali, Bhutia, Lepcha, Kolam, Nayak,                                                           |

|   |                      |                              |                                                                                                                                                                           |
|---|----------------------|------------------------------|---------------------------------------------------------------------------------------------------------------------------------------------------------------------------|
|   |                      |                              | Koya,Gond                                                                                                                                                                 |
|   |                      | <i>Veillonella</i>           | Drukpa Bhutia                                                                                                                                                             |
|   |                      | <i>Lactobacillus</i>         | Adi, Apatani, Nyshi, Drukpa Bhutia, Korbi, Tai-Aiton, Bodo, Santal, Tai-Phake, Meitei, Kuki, Tangkhul, Nepali, Bhutia, Lepcha, Kolam, Nayak, Koya                         |
|   |                      | <i>Catenibacterium</i>       | Adi, Apatani, Nyshi, Savar                                                                                                                                                |
|   |                      | <i>Streptococcus</i>         | Adi, Apatani, Nyshi, Savar, Drukpa Bhutia, Malaiyali                                                                                                                      |
|   |                      | <i>Bulleidia</i>             | Savar, Drukpa Bhutia                                                                                                                                                      |
|   |                      | <i>Coprococcus</i>           | Adi, Apatani, Nyshi, Drukpa Bhutia                                                                                                                                        |
|   |                      | <i>Dorea</i>                 | Adi, Apatani, Nyshi                                                                                                                                                       |
|   |                      | <i>Lachnospira</i>           | Adi, Apatani, Nyshi, Savar, Drukpa Bhutia                                                                                                                                 |
|   |                      | <i>Staphylococcus</i>        | Adi, Apatani, Nyshi                                                                                                                                                       |
|   |                      | <i>Subdoligranulum</i>       | Malaiyali                                                                                                                                                                 |
|   |                      | <i>Phascolarctobacterium</i> | Drukpa Bhutia, Korbi, Kolam, Gond, Nayak, Koya                                                                                                                            |
|   |                      | <i>Butyrivibrio</i>          | Korbi, Tai-Aiton, Bodo, Santal, Tai-Phake, Meitei, Kuki, Tangkhul, Bhutia, Kolam, Gond, Nayak, Koya                                                                       |
|   |                      | <i>Megasphaera</i>           | Korbi, Santal, Gond, Kolam                                                                                                                                                |
| 4 | <i>Bacteroidetes</i> | <i>Prevotella</i>            | Adi, Apatani, Nyshi, Savar, Korbi, Tai-Aiton, Bodo, Santal, Tai-Phake, Meitei, Kuki, Tangkhul, Nepali, Bhutia, Lepcha, Kolam, Nayak, Koya, Gond, Malaiyali                |
|   |                      | <i>Odoribacter</i>           | Savar                                                                                                                                                                     |
|   |                      | <i>Parabacteroides</i>       | Savar                                                                                                                                                                     |
|   |                      | <i>Bacteroides</i>           | Adi, Apatani, Nyshi, Tai-Aiton, Bodo, Tai-Phake, Meitei, Bhutia, Drukpa Bhutia, Kolam, Gond, Nayak, Koya                                                                  |
|   |                      | <i>Flavobacterium</i>        | Adi, Apatani, Nyshi                                                                                                                                                       |
|   |                      | <i>Alistipes</i>             | Korbi, Bodo, Santal, Tai-Phake, Meitei, Nepali, Nayak                                                                                                                     |
| 5 | <i>Elusimicrobia</i> | -                            | Adi, Apatani, Nyshi                                                                                                                                                       |
| 6 | <i>Firmicutes</i>    | -                            | Adi, Apatani, Nyshi, Drukpa Bhutia, Savar, Korbi, Tai-Aiton, Bodo, Santal, Tai-Phake, Meitei, Kuki, Tangkhul, Nepali, Bhutia, Lepcha, Kolam, Nayak, Koya, Gond, Malaiyali |

|    |                        |                     |                                                                                                                                                     |
|----|------------------------|---------------------|-----------------------------------------------------------------------------------------------------------------------------------------------------|
| 7  | <i>Fusobacteria</i>    | -                   | Adi, Apatani, Nyshi                                                                                                                                 |
| 8  | <i>Proteobacteria</i>  | -                   | Adi, Apatani, Nyshi, Korbi, Tai-Aiton, Bodo, Santal, Tai-Phake, Meitei, Kuki, Tangkhul, Nepali, Bhutia, Lepcha, Kolam, Nayak, Koya, Gond, Malaiyali |
| 9  | <i>Pseudomonadota</i>  | <i>Enterobacter</i> | Adi, Apatani, Nyshi, Malaiyali                                                                                                                      |
|    |                        | <i>Proteus</i>      | Drukpa Bhutia                                                                                                                                       |
|    |                        | <i>Citrobacter</i>  | Adi, Apatani, Nyshi                                                                                                                                 |
| 10 | <i>Verrucomicrobia</i> | <i>Akkermansia</i>  | Savar                                                                                                                                               |
